# Supplementary material for: Controllable synthesis of Ni nanotube arrays and their structure-dependent catalytic activity toward dye degradation
Source: Royal Society of Chemistry journal article supplement (doi:10.1039/c4ce00225c), 2014-01-01
Supplement: c4ce00225c1.pdf [file c4ce00225c1.pdf]

## Supplementary Information

### 5 Controllable Synthesis of Ni Nanotube Arrays and Their Structure-Dependent Catalytic Activity toward Dye Degradation

Xiang-Zi Li,<sup>a,b</sup> Kong-Lin Wu,<sup>b</sup> Yin Ye,<sup>b</sup> and Xian-Wen Wei<sup>\*b</sup>

10 <sup>[a]</sup>Department of Chemistry, Wannan Medical College, Wuhu 241002, People's Republic of China

<sup>[b]</sup>College of Chemistry and Materials Science, Key Laboratory of Functional Molecular Solids, the Ministry of Education, Anhui Laboratory of Molecule-based Materials, Anhui Normal University, Wuhu 241000, People's Republic of China.

15

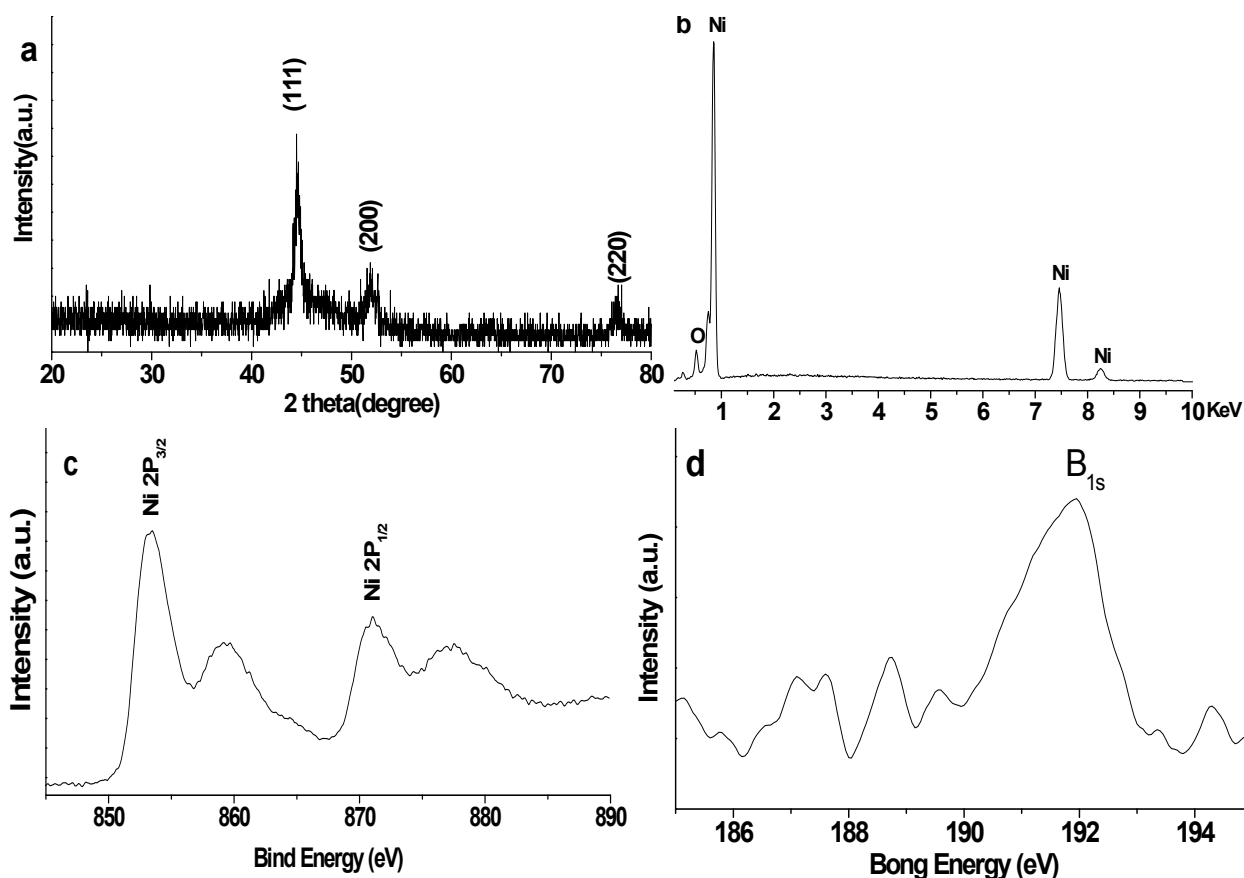

20

Fig. S1 XRD, EDS and XPS spectra of the nanotubes (280 nm).

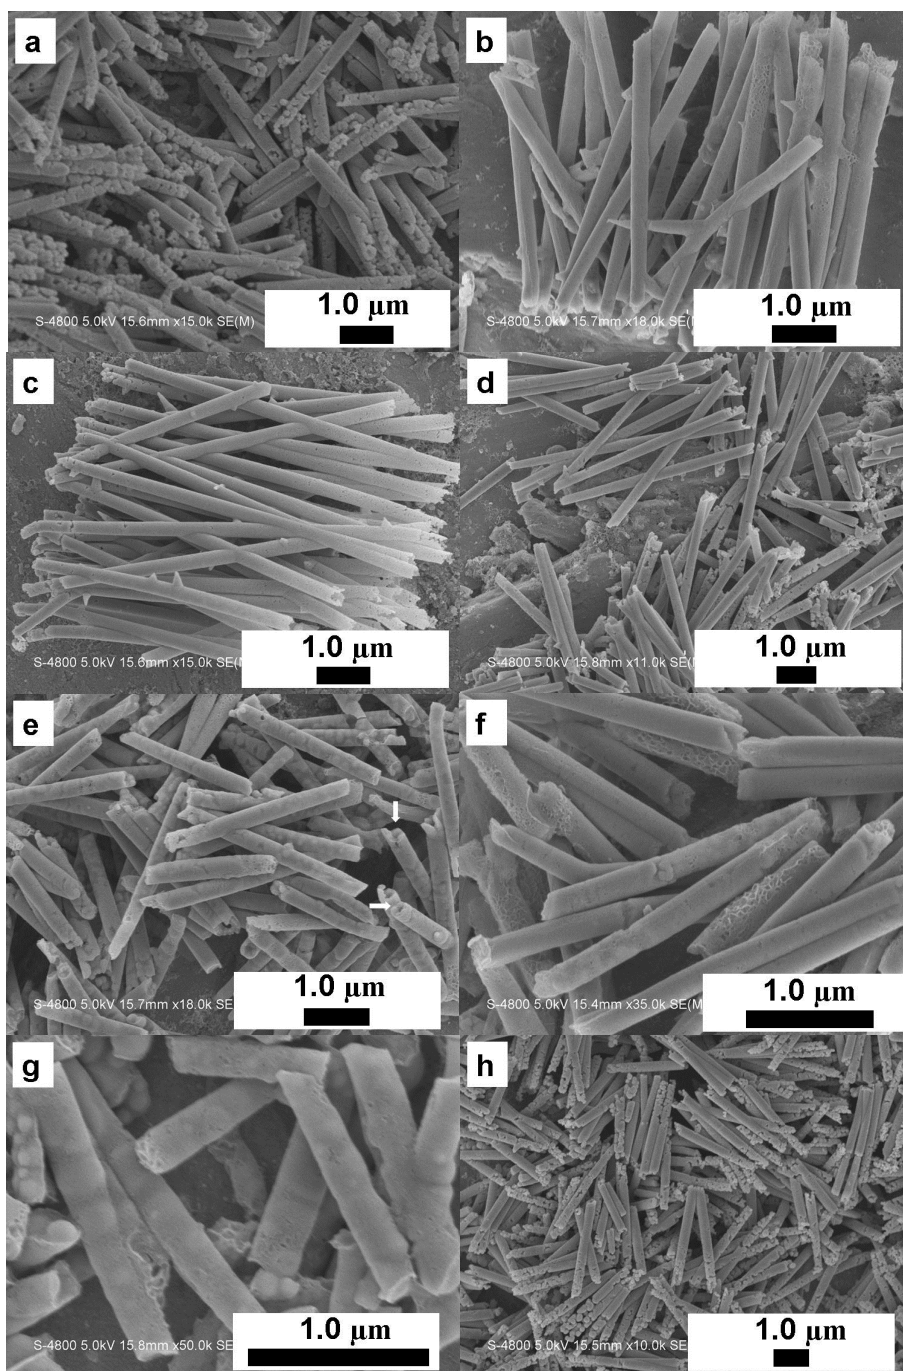

5

**Fig. S2** SEM of the Ni nanotubes and nanorods at different concentrations (the template pore diameter of PC template is 0.2 μm, reaction time is 150 s). a, No. 1. b-h, No. 3-9 (Tab. 2).

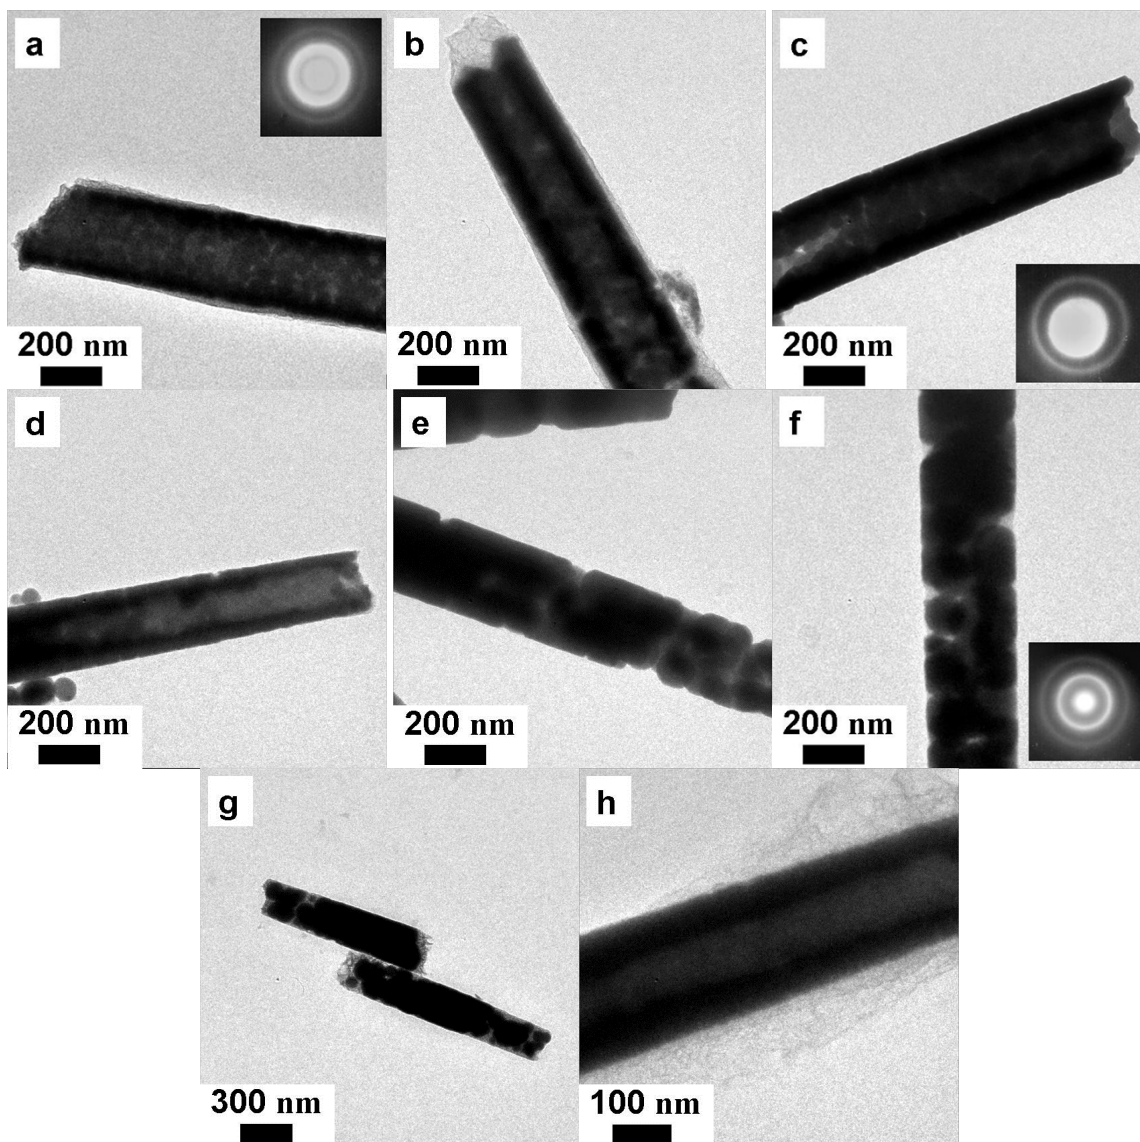

**Fig. S3** TEM of the Ni nanotubes and nanorods at different concentrations (the template pore diameter of PC template is 50.2  $\mu\text{m}$ , reaction time is 150 s). a, No. 1. b-h, No. 3-9 (Tab. 2). Inserts are SAED patterns.

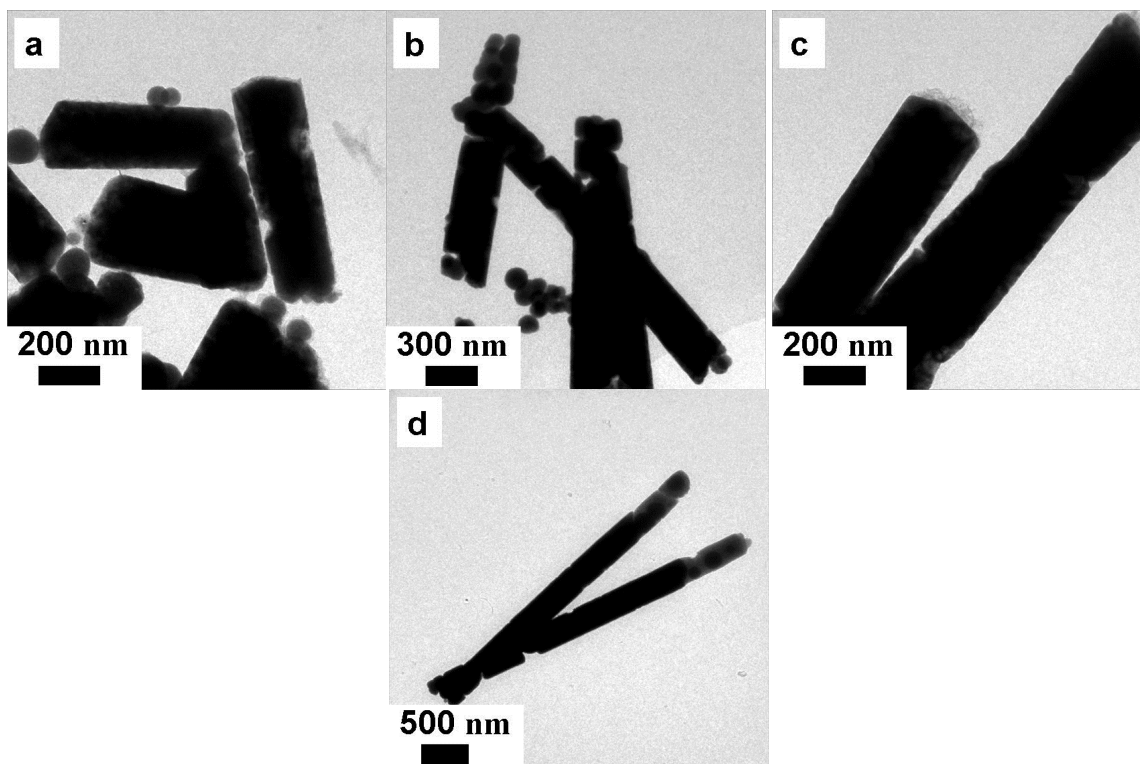

**Fig. S4** TEM of the Ni nanorods at different reaction time with PC membrane (template pore diameter is 0.2  $\mu\text{m}$ , C ( $\text{NaBH}_4$ ) =0.05M, C ( $\text{Ni}^{2+}$ ) =0.10M): (a) 1 min, (b) 5 min, (c) 10 min, and (d) 30 min.

5

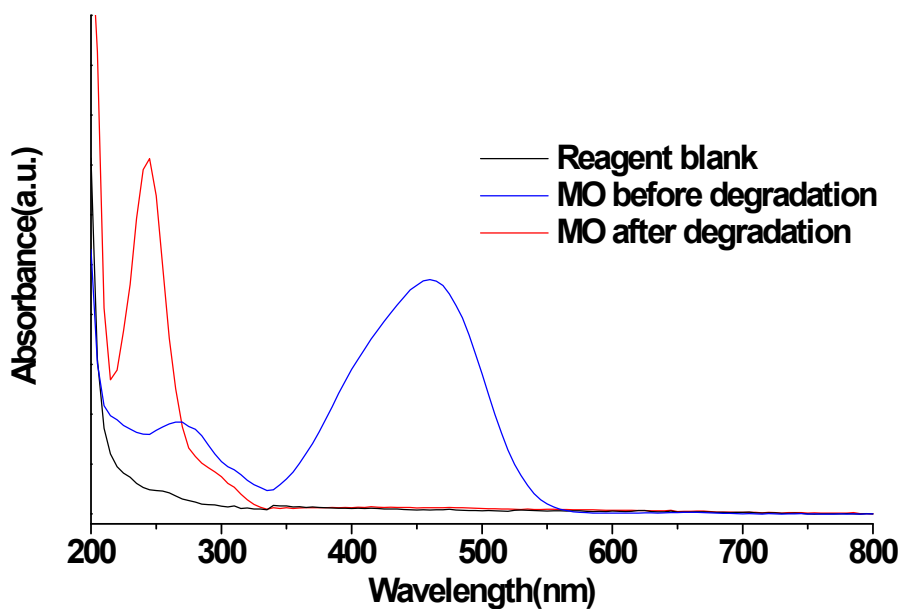

10 **Fig. S5** UV-vis absorption spectra of MO degradation by  $\text{NaBH}_4$  using Ni nanotubes as catalyst at room temperature.

5

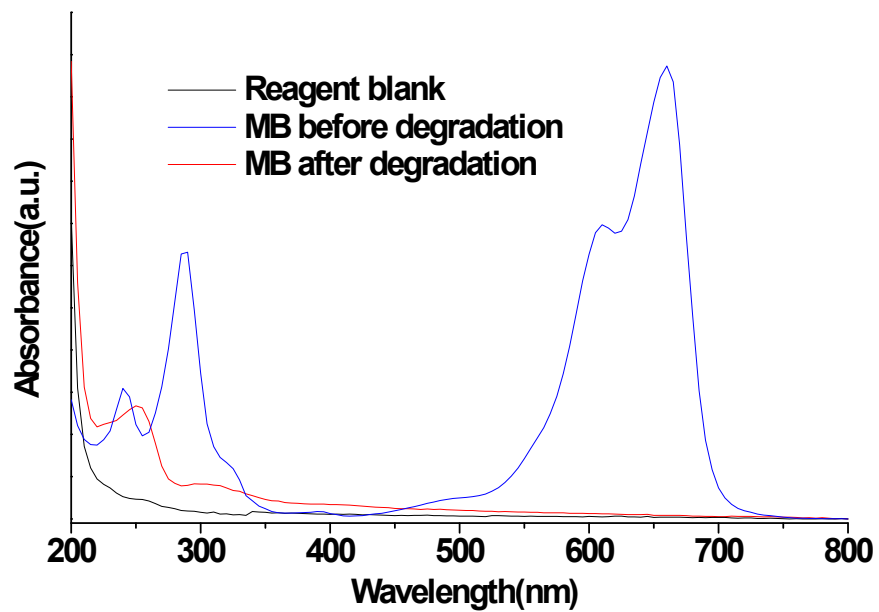

**Fig. S6** UV-vis absorption spectra of MB degradation by NaBH<sub>4</sub> using Ni nanotubes as catalyst at room temperature.

10

15

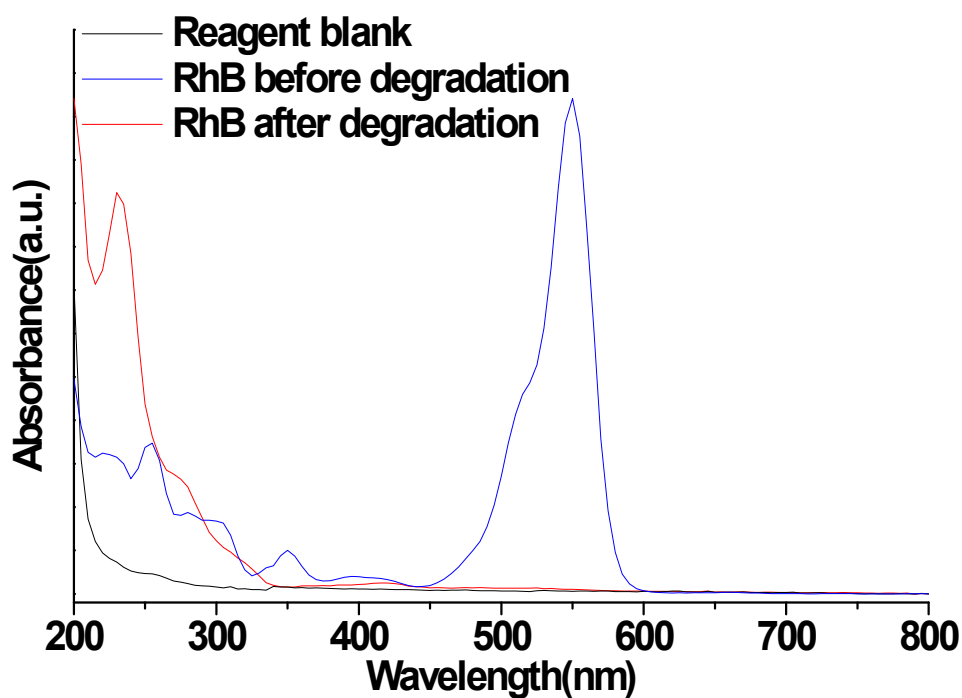

Fig. S7 UV-vis absorption spectra of RhB degradation by  $\text{NaBH}_4$  using Ni nanotubes as catalyst at room temperature.

5

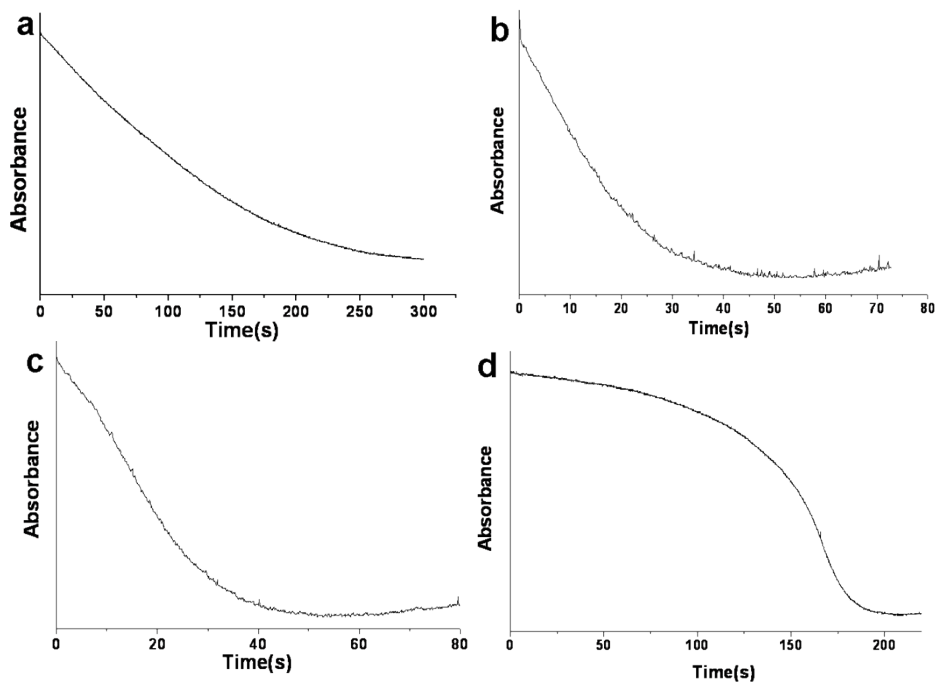

10

Fig. S8 The typical time dependence of the degradation for MO (at 460 nm) with the Ni nanotubes obtained in PC membrane with different template pore diameter: a, 2.0  $\mu\text{m}$ . b, 0.2  $\mu\text{m}$ . c, 0.05  $\mu\text{m}$ . d, 0.015  $\mu\text{m}$ .

5

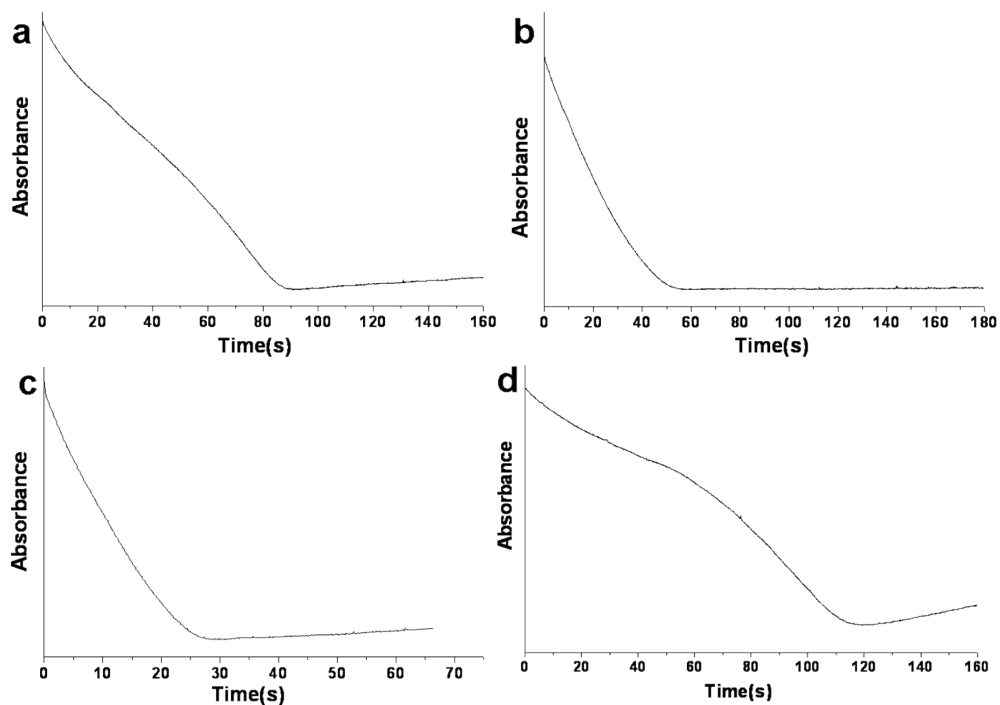

10 **Fig. S9** The typical time dependence of the degradation for MB (at 660 nm) with the Ni nanotubes obtained in PC membrane with different template pore diameter: a, 2.0 μm. b, 0.2 μm. c, 0.05 μm. d, 0.015 μm.

15

20

5

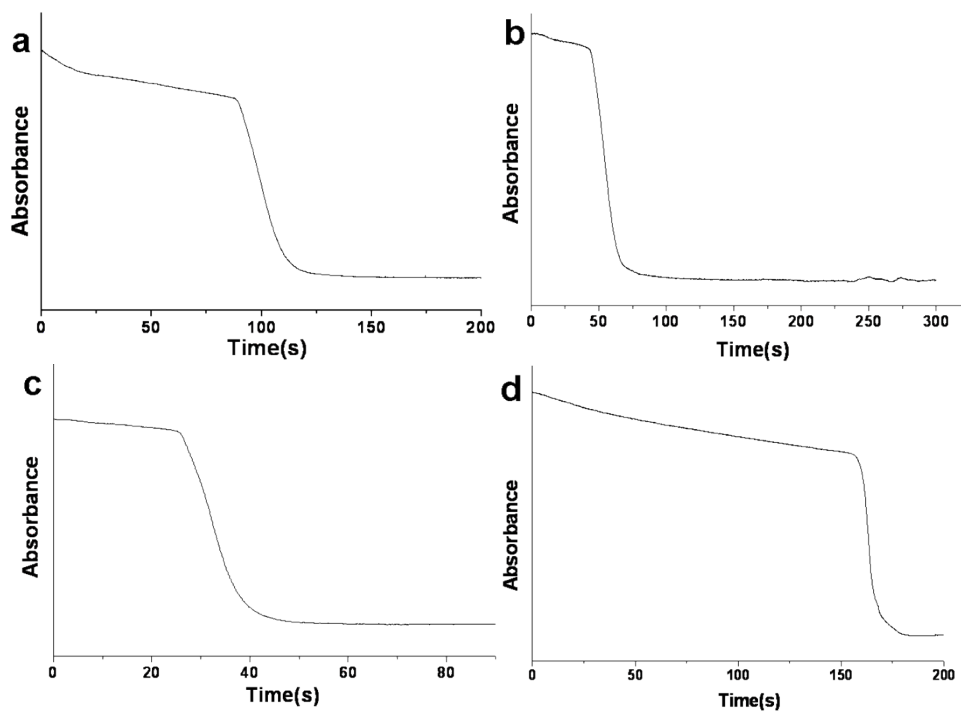

**Fig. S10** The typical time dependence of the degradation for RhB (at 550 nm) with the Ni nanotubes obtained in PC membrane with different template pore diameter: a, 2.0 μm. b, 0.2 μm. c, 0.05 μm. d, 0.015 μm.

10
